# Supplementary material for: Correction: An Optimum Principle Predicts the Distribution of Axon Diameters in Normal White Matter
Source: PubMed Central journal article supplement (PMC3866306; doi:10.1371/annotation/295b3621-1d29-43ac-8180-6fad3d2de593), 2013-12-17
Supplement: pone.295b3621-1d29-43ac-8180-6fad3d2de593.s001.pdf [file pone.295b3621-1d29-43ac-8180-6fad3d2de593.s001.pdf]

| Dataset (#) | IUBD          | TRD           | GD            | LND               | PMD           |
|-------------|---------------|---------------|---------------|-------------------|---------------|
| EMD1 (1)    | a=3.6 b=7     | a=2.4 b=-11   | a=11 b=0.067  | a=-0.33 b=0.31    | a=3.3 b=7.7   |
| EMD1 (2)    | a=3.6 b=6.7   | a=2.2 b=-11   | a=11 b=0.069  | a=-0.3 b=0.31     | a=3.3 b=7.4   |
| EMD1 (3)    | a=2.3 b=3.9   | a=2.4 b=-6.7  | a=7 b=0.11    | a=-0.27 b=0.4     | a=1.9 b=4.6   |
| EMD1 (4)    | a=2.9 b=5.5   | a=2.4 b=-8.8  | a=8.9 b=0.083 | a=-0.32 b=0.35    | a=2.6 b=6.3   |
| EMD1 (5)    | a=3.7 b=7.6   | a=2.4 b=-11   | a=12 b=0.062  | a=-0.35 b=0.3     | a=3.4 b=8.3   |
| EMD1 (6)    | a=1.9 b=0.9   | a=0.92 b=-3.4 | a=3.7 b=0.42  | a=0.39 b=0.59     | a=1.4 b=1.3   |
| EMD1 (7)    | a=1.8 b=1.9   | a=1.8 b=-4.4  | a=4.9 b=0.2   | a=-0.046 b=0.5    | a=1.4 b=2.6   |
| EMD1 (8)    | a=1.6 b=1.8   | a=1.9 b=-4.2  | a=4.6 b=0.22  | a=-0.046 b=0.52   | a=1.3 b=2.4   |
| EMD1 (9)    | a=1.8 b=1.6   | a=1.6 b=-4.2  | a=4.4 b=0.25  | a=0.036 b=0.52    | a=1.4 b=2.2   |
| EMD1 (10)   | a=1.4 b=1.5   | a=2.1 b=-3.6  | a=3.9 b=0.26  | a=-0.04 b=0.56    | a=1 b=2.1     |
| EMD1 (11)   | a=2.5 b=3.3   | a=1.8 b=-6.6  | a=6.9 b=0.13  | a=-0.14 b=0.4     | a=2.2 b=4     |
| EMD1 (12)   | a=2.6 b=3.7   | a=2 b=-6.9    | a=7.2 b=0.12  | a=-0.19 b=0.39    | a=2.2 b=4.4   |
| EMD1 (13)   | a=1.9 b=2.6   | a=2.1 b=-5.3  | a=5.4 b=0.16  | a=-0.17 b=0.46    | a=1.6 b=3.3   |
| EMD1 (14)   | a=2.1 b=2.8   | a=2 b=-5.7    | a=5.9 b=0.15  | a=-0.14 b=0.44    | a=1.8 b=3.5   |
| EMD1 (15)   | a=3.2 b=5     | a=2 b=-8.8    | a=9.1 b=0.091 | a=-0.22 b=0.35    | a=2.9 b=5.6   |
| EMD1 (16)   | a=1.9 b=1.5   | a=1.4 b=-4.1  | a=4.3 b=0.27  | a=0.11 b=0.53     | a=1.4 b=2     |
| EMD1 (17)   | a=2 b=1.7     | a=1.5 b=-4.4  | a=4.6 b=0.24  | a=0.069 b=0.5     | a=1.5 b=2.2   |
| EMD1 (18)   | a=1.7 b=2.1   | a=2.1 b=-4.6  | a=5 b=0.18    | a=-0.12 b=0.49    | a=1.4 b=2.8   |
| EMD1 (19)   | a=1.7 b=1.8   | a=1.7 b=-4.3  | a=4.7 b=0.22  | a=-0.013 b=0.51   | a=1.4 b=2.4   |
| EMD1 (20)   | a=1.7 b=1.8   | a=1.8 b=-4.3  | a=4.4 b=0.24  | a=-0.011 b=0.52   | a=1.3 b=2.3   |
| EMD1 (21)   | a=2.5 b=3.2   | a=1.8 b=-6.4  | a=6.7 b=0.14  | a=-0.12 b=0.41    | a=2.1 b=3.8   |
| EMD1 (22)   | a=2 b=2.2     | a=1.8 b=-4.9  | a=5.2 b=0.19  | a=-0.055 b=0.47   | a=1.6 b=2.8   |
| EMD1 (23)   | a=1.7 b=2.5   | a=2.4 b=-4.9  | a=5.3 b=0.16  | a=-0.21 b=0.47    | a=1.4 b=3.3   |
| EMD1 (24)   | a=1.8 b=2     | a=1.9 b=-4.5  | a=4.8 b=0.2   | a=-0.06 b=0.5     | a=1.4 b=2.6   |
| EMD1 (25)   | a=2.1 b=2.6   | a=1.9 b=-5.4  | a=5.7 b=0.16  | a=-0.12 b=0.45    | a=1.7 b=3.2   |
| EMD1 (26)   | a=1.7 b=1.4   | a=1.5 b=-3.8  | a=4 b=0.3     | a=0.11 b=0.55     | a=1.3 b=1.9   |
| EMD1 (27)   | a=2.2 b=1.7   | a=1.3 b=-4.6  | a=4.7 b=0.25  | a=0.13 b=0.5      | a=1.7 b=2.2   |
| EMD1 (28)   | a=1.6 b=1.5   | a=1.8 b=-3.9  | a=4.1 b=0.27  | a=0.018 b=0.54    | a=1.2 b=2.1   |
| EMD1 (29)   | a=1.4 b=0.86  | a=1.5 b=-2.9  | a=3.1 b=0.43  | a=0.22 b=0.64     | a=0.92 b=1.3  |
| EMD1 (30)   | a=2 b=1.4     | a=1.3 b=-4.2  | a=4.3 b=0.28  | a=0.15 b=0.52     | a=1.5 b=1.9   |
| EMD1 (31)   | a=0.88 b=0.19 | a=1.5 b=-1.6  | a=1.8 b=1.3   | a=0.67 b=0.92     | a=0.42 b=0.56 |
| EMD1 (32)   | a=1.5 b=1.3   | a=1.8 b=-3.6  | a=3.9 b=0.28  | a=0.044 b=0.56    | a=1.1 b=1.9   |
| EMD1 (33)   | a=2.1 b=2.1   | a=1.6 b=-4.9  | a=5.5 b=0.19  | a=-0.00092 b=0.47 | a=1.8 b=2.8   |
| EMD1 (34)   | a=1.2 b=1.3   | a=2.3 b=-3.3  | a=3.7 b=0.27  | a=-0.057 b=0.59   | a=0.88 b=2    |
| EMD1 (35)   | a=2 b=2       | a=1.7 b=-4.8  | a=5.4 b=0.19  | a=-0.021 b=0.48   | a=1.7 b=2.7   |
| EMD2 (1)    | a=3.2 b=5     | a=2 b=-8.7    | a=9 b=0.091   | a=-0.23 b=0.35    | a=2.8 b=5.7   |
| EMD2 (2)    | a=3.8 b=4     | a=1.3 b=-8.6  | a=8.8 b=0.11  | a=-0.025 b=0.35   | a=3.4 b=4.5   |
| EMD2 (3)    | a=4 b=2.7     | a=0.91 b=-7.4 | a=7.6 b=0.16  | a=0.19 b=0.38     | a=3.5 b=3.2   |
| EMD2 (4)    | a=2.4 b=1.4   | a=0.98 b=-4.5 | a=4.7 b=0.29  | a=0.26 b=0.5      | a=1.9 b=1.9   |
| EMD2 (5)    | a=3.9 b=4.8   | a=1.5 b=-9.4  | a=9.6 b=0.096 | a=-0.1 b=0.34     | a=3.5 b=5.4   |
| EMD2 (6)    | a=4 b=4.2     | a=1.3 b=-9    | a=9.3 b=0.11  | a=-0.015 b=0.34   | a=3.6 b=4.7   |
| EMD3 (1)    | a=2.5 b=3.4   | a=1.9 b=-6.5  | a=6.6 b=0.13  | a=-0.15 b=0.41    | a=2.1 b=4     |
| EMD3 (2)    | a=2.2 b=3.2   | a=2 b=-6.1    | a=6.4 b=0.14  | a=-0.18 b=0.42    | a=1.9 b=3.8   |
| EMD3 (3)    | a=2.4 b=2.6   | a=1.6 b=-5.8  | a=6.2 b=0.16  | a=-0.036 b=0.44   | a=2 b=3.2     |
| EMD3 (4)    | a=2.4 b=1.8   | a=1.2 b=-4.9  | a=5 b=0.24    | a=0.15 b=0.48     | a=1.9 b=2.3   |
| EMD3 (5)    | a=3.2 b=2.4   | a=1.1 b=-6.2  | a=6.6 b=0.18  | a=0.13 b=0.42     | a=2.7 b=2.9   |

TABLE S1: The values of parameters obtained for the best fits found for each model and each data set
